# Supplementary material for: Genetic Variability for the Yield and Yield-Related Traits in Some Maize (Zea mays L.) Inbred Lines in the Central Highland of Ethiopia
Source: Hindawi journal article supplement (doi:10.1155/2024/9721304), 2024-01-04
Supplement: f1 [file 9721304.f1.docx]

Supplementary Figures that showed the different growth stages of maize inbred lines samples evaluated at

Ambo Plant Protection Research Center during 2013/14.


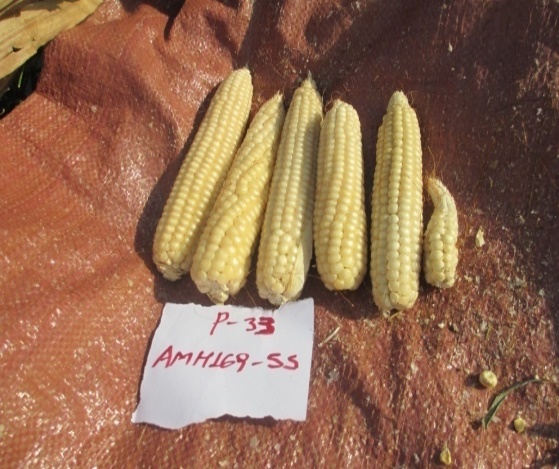

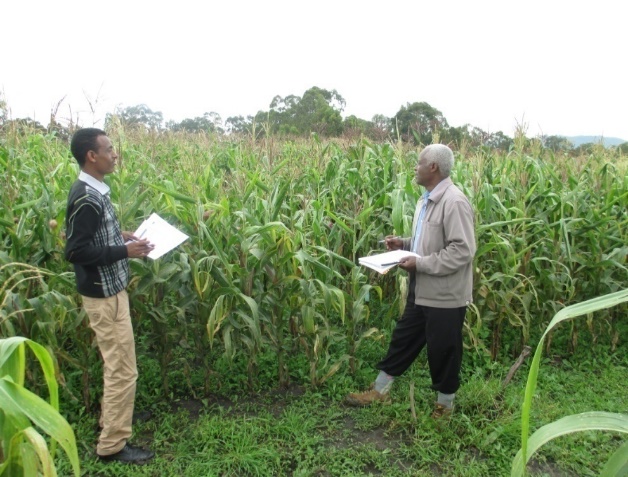


Sup Figure 1. Research site supervision with advisor Sup Figure 2.Sample of harvested maize inbred line

(Right) and researcher (left)


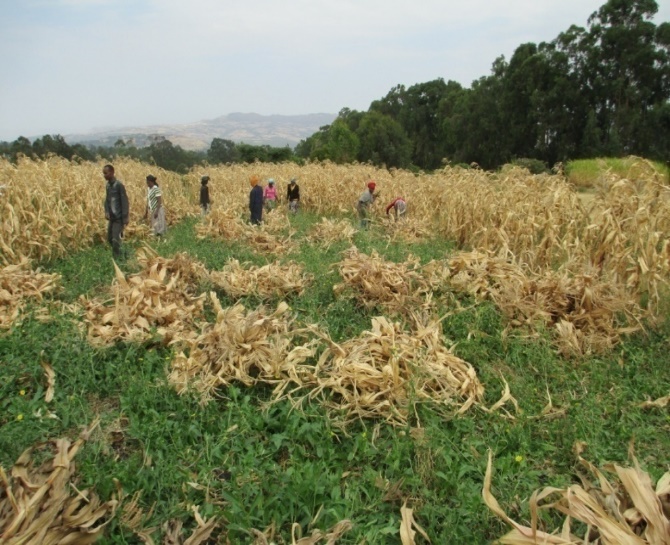

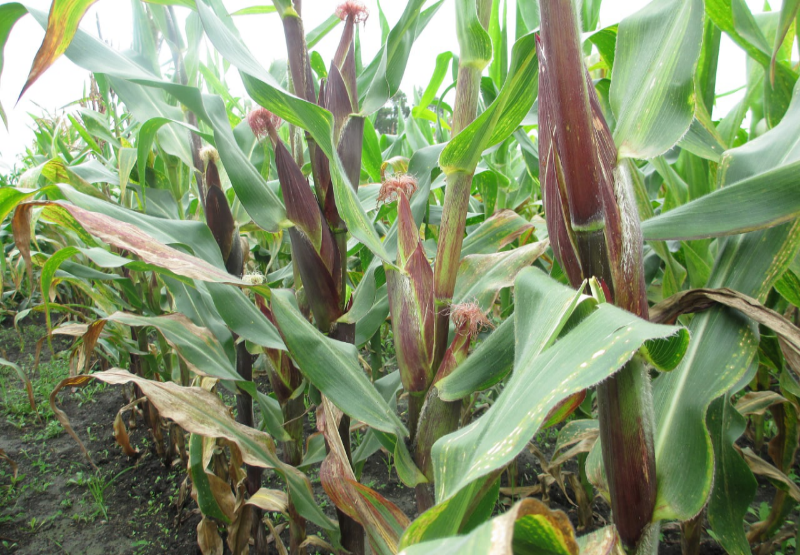


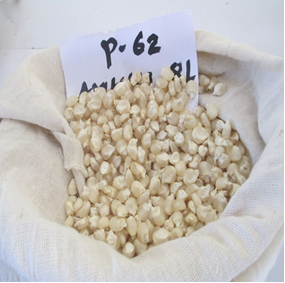
Sup Figure 3. 50% of tasseling and silking days Sup Figure 4. Data collection during harvesting time

Sup Figure 5. Maize inbred line sample with high yield
